# Supplementary material for: Concordance in measurable residual disease result after first and second induction cycle in acute myeloid leukemia: An outcome- and cost-analysis
Source: PubMed Central journal article supplement (PMC9589259; doi:10.3389/fonc.2022.999822), 2022-10-10
Supplement: DataSheet_1.pdf [file DataSheet_1.pdf]

*Tettero et al. Supplementary Material*

**Table S1: Overview of induction cycle I and cycle II per included trial**

| <b>Study</b>  | <b>Induction cycle I</b>                                                                                                                                                                   | <b>Induction cycle II</b>                                                                                                                                                                       |
|---------------|--------------------------------------------------------------------------------------------------------------------------------------------------------------------------------------------|-------------------------------------------------------------------------------------------------------------------------------------------------------------------------------------------------|
| <b>AML92</b>  | <b>Idarubicin</b> 12mg/m <sup>2</sup> for 3 days and <b>cytarabine</b> 200mg/m <sup>2</sup> for 7 days (with or without laromustine on day 2)                                              | <b>Amsacrine</b> 120mg/m <sup>2</sup> for 3 days and <b>cytarabine</b> 1g/m <sup>2</sup> twice daily on days 1-6 (with or without laromustine on day 2)                                         |
| <b>AML102</b> | <b>Idarubicin</b> 12 mg/m <sup>2</sup> for 3 days and <b>cytarabine</b> 200 mg/m <sup>2</sup> for 7 days (with or without the addition of clofarabine at 10 mg/m <sup>2</sup> for 5 days)  | <b>Amsacrine</b> 120 mg/m <sup>2</sup> for 3 days and <b>cytarabine</b> 1g/m <sup>2</sup> twice daily on days 1-6 (with or without the addition of clofarabine 10 mg/m <sup>2</sup> for 5 days) |
| <b>AML103</b> | <b>Daunorubicin</b> 60 mg/m <sup>2</sup> for 3 days and <b>cytarabine</b> 1g/m <sup>2</sup> twice daily on days 1-6 (with or without the addition of lenalidomide/Tosedostat on days 1-21) | <b>Cytarabine</b> 1g/m <sup>2</sup> twice daily on days 1-6 (with or without the addition of lenalidomide/Tosedostat on days 1-21)                                                              |
| <b>AML132</b> | <b>Idarubicin</b> 12 mg/m <sup>2</sup> for 3 days and <b>cytarabine</b> 200 mg/m <sup>2</sup> for 7 days (with or without lenalidomide 10/15mg on days 1-21)                               | <b>Daunorubicin</b> 60 mg/m <sup>2</sup> for 3 days and <b>cytarabine</b> 1g/m <sup>2</sup> twice daily on days 1-6 (with or without the addition of lenalidomide 10/15mg on days 1-21)         |

**Table S2A: 6-color antibody panel**

| <b>Tube</b> | <b>FITC</b> | <b>PE</b> | <b>PerCP</b> | <b>PC7</b> | <b>APC</b> | <b>APC-H7</b> |
|-------------|-------------|-----------|--------------|------------|------------|---------------|
| <b>1</b>    | PBS         | PBS       | CD45         | CD34       | PBS        | PBS           |
| <b>2</b>    | CD2         | CD7       | CD45         | CD34       | CD13       | HLA-DR        |
| <b>3</b>    | CD36        | CD133     | CD45         | CD34       | CD22       | CD19          |
| <b>4</b>    | CD15        | CD33      | CD45         | CD34       | CD11b      | CD14          |
| <b>5</b>    | CD13        | CD56      | CD45         | CD34       | CD117      | HLA-DR        |

**Table S2B: 8-color antibody panel in 5 tubes**

| <b>Tube</b> | <b>FITC</b> | <b>PE</b>         | <b>PerCP-CY5.5</b> | <b>PC7</b> | <b>APC</b> | <b>APC-H7</b> | <b>HV450</b> | <b>KO</b> |
|-------------|-------------|-------------------|--------------------|------------|------------|---------------|--------------|-----------|
| <b>1</b>    | HLA-DR      | CD33              | CD13               | PBS        | CD14       | PBS           | CD34         | CD45      |
| <b>2</b>    | CD44        | CLL-1/<br>CLEC12a | CD13               | CD56       | CD38       | HLA-DR        | CD34         | CD45      |
| <b>3</b>    | CD7         | TIM-3             | CD13               | CD117      | CD38       | CD19          | CD34         | CD45      |
| <b>4</b>    | CD2         | CD133             | CD13               | CD117      | CD38       | CD19          | CD34         | CD45      |
| <b>5</b>    | CD36        | CD123             | CD13               | CD33       | CD38       | CD14          | CD34         | CD45      |

**Table S2C: 8-color antibody panel in 4 tubes**

| <b>Tube</b> | <b>FITC</b> | <b>PE</b> | <b>PerCP-CY5.5</b> | <b>PC7</b> | <b>APC</b> | <b>APC-H7</b> | <b>BV421</b> | <b>HV500c</b> |
|-------------|-------------|-----------|--------------------|------------|------------|---------------|--------------|---------------|
| <b>1</b>    | CD7         | CD56      | CD34               | CD117      | CD33       | HLA-DR        | CD13         | CD45          |
| <b>2</b>    | CD15        | CD22      | CD34               | CD117      | CD19       | HLA-DR        | CD13         | CD45          |
| <b>3</b>    | CD36        | CD14      | CD34               | CD117      | CD11b      | HLA-DR        | CD13         | CD45          |
| <b>4</b>    | CD2         | CD133     | CD34               | CD117      | CD33       | HLA-DR        | CD13         | CD45          |

**Table S3: Cost prices used. All prices are fixed tariffs in euros negotiated between health insurers and hospitals from the Dutch Health Insurance Council from 2022 in Euros**

| <b>Variable</b> | <b>Medical description of product</b>                                                                           | <b>Cost</b> |
|-----------------|-----------------------------------------------------------------------------------------------------------------|-------------|
| <b>BM+MRD</b>   | Bone marrow aspiration done by a hematologist with total cost of MRD measurement via flow cytometry             | € 1,689.13  |
| <b>MUD</b>      | Search without purchase of match unrelated donor (MUD) used for allogeneic stem cell transplantation (allo-SCT) | € 16,371.99 |
| <b>HLA-sib</b>  | Search without harvesting of stem cells of HLA-identical sibling (HLA-sib) donor                                | € 4,834.08  |

Table S4A: Univariate testing of predictors for EFS

| <b>Event Free Survival</b>           |          |              |                    |           |               |                |
|--------------------------------------|----------|--------------|--------------------|-----------|---------------|----------------|
| <b>Variables</b>                     | <b>N</b> |              | <b>Coefficient</b> | <b>SE</b> | <b>95% CI</b> | <b>P Value</b> |
| <b>Age in 3 categories</b>           | 72       | <=45         |                    |           |               |                |
|                                      | 123      | 46-60        | 1.240              | 0.238     | 0.778-1.977   | 0.366          |
|                                      | 78       | >60          | 1.679              | 0.250     | 1.029-2.740   | 0.038          |
| <b>Sex</b>                           | 135      | Male         |                    |           |               |                |
|                                      | 138      | Female       | 0.740              | 0.181     | 0.519-1.054   | 0.095          |
| <b>WHO performance status</b>        | 136      | WHO 0        |                    |           |               |                |
|                                      | 89       | WHO 1        | 1.257              | 0.202     | 0.847-1.866   | 0.256          |
|                                      | 9        | WHO 2        | 1.221              | 0.518     | 0.443-3.370   | 0.700          |
| <b>WBC count at diagnosis</b>        | 150      | <20          |                    |           |               |                |
|                                      | 54       | 20-100       | 1.278              | 0.226     | 0.820-1.990   | 0.278          |
|                                      | 17       | >100         | 1.259              | 0.375     | 0.604-2.624   | 0.539          |
| <b>ELN-2017 risk score</b>           | 112      | Favorable    |                    |           |               |                |
|                                      | 82       | Intermediate | 1.121              | 0.231     | 0.714-1.762   | 0.620          |
|                                      | 78       | Adverse      | 1.958              | 0.210     | 1.297-2.957   | 0.001          |
| <b>FLT3ITD x NPM1</b>                | 40       | Pos x pos    |                    |           |               |                |
|                                      | 25       | Pos x neg    | 1.631              | 0.372     | 0.787-3.380   | 0.189          |
|                                      | 60       | Neg x pos    | 1.006              | 0.324     | 0.532-1.899   | 0.987          |
|                                      | 126      | Neg x neg    | 1.267              | 0.288     | 0.720-2.229   | 0.412          |
| <b>Consolidation treatment</b>       | 26       | None         |                    |           |               |                |
|                                      | 80       | Cycle 3      | 1.286              | 0.369     | 0.624-2.651   | 0.495          |
|                                      | 53       | Auto-SCT     | 1.024              | 0.396     | 0.471-2.224   | 0.953          |
|                                      | 114      | Allo-SCT     | 1.261              | 0.361     | 0.621-2.558   | 0.521          |
| <b>Flow MRD status after cycle 1</b> | 196      | Neg          |                    |           |               |                |
|                                      | 77       | Pos          | 2.097              | 0.186     | 1.456-3.018   | 0.000          |
| <b>Flow MRD status after cycle 2</b> | 216      | Neg          |                    |           |               |                |
|                                      | 57       | Pos          | 2.031              | 0.201     | 1.371-3.010   | 0.000          |

Auto-SCT, Autologous stem cell transplantation; Allo-SCT, Allogeneic stem cell transplant; ELN, European Leukemia-NET; Neg, negative; Pos, positive; SE, standard error; CI, confidence interval; WBC, white blood cell count; WHO, world health organization.

**Table S4B: Univariate testing of predictors for OS**

| <b>Overall Survival</b>              |          |              |                    |           |               |                |
|--------------------------------------|----------|--------------|--------------------|-----------|---------------|----------------|
| <b>Variables</b>                     | <b>N</b> |              | <b>Coefficient</b> | <b>SE</b> | <b>95% CI</b> | <b>P Value</b> |
| <b>Age in 3 categories</b>           | 72       | <=45         |                    |           |               |                |
|                                      | 123      | 46-60        | 1.376              | 0.275     | 0.803-1.376   | 0.246          |
|                                      | 78       | >60          | 2.308              | 0.280     | 1.332-3.999   | 0.003          |
| <b>Sex</b>                           | 135      | Male         |                    |           |               |                |
|                                      | 138      | Female       | 0.721              | 0.199     | 0.488-1.064   | 0.098          |
| <b>WHO performance status</b>        | 136      | WHO 0        |                    |           |               |                |
|                                      | 89       | WHO 1        | 1.293              | 0.224     | 0.834-2.005   | 0.251          |
|                                      | 9        | WHO 2        | 1.606              | 0.522     | 0.577-4.473   | 0.364          |
| <b>WBC count at diagnosis</b>        | 150      | <20          |                    |           |               |                |
|                                      | 54       | 20-100       | 1.324              | 0.247     | 0.816-2.148   | 0.255          |
|                                      | 17       | >100         | 1.082              | 0.432     | 0.464-2.521   | 0.855          |
| <b>ELN-2017 risk score</b>           | 112      | Favorable    |                    |           |               |                |
|                                      | 82       | Intermediate | 1.206              | 0.268     | 0.714-2.037   | 0.484          |
|                                      | 78       | Adverse      | 2.842              | 0.231     | 1.806-4.473   | 0.000          |
| <b>FLT3ITD x NPM1</b>                | 40       | Pos x pos    |                    |           |               |                |
|                                      | 25       | Pos x neg    | 1.634              | 0.409     | 0.733-3.642   | 0.230          |
|                                      | 60       | Neg x pos    | 1.012              | 0.359     | 0.500-2.047   | 0.973          |
|                                      | 126      | Neg x neg    | 1.268              | 0.320     | 0.677-2.376   | 0.458          |
| <b>Consolidation treatment</b>       | 26       | None         |                    |           |               |                |
|                                      | 80       | Cycle 3      | 0.768              | 0.365     | 0.375-1.571   | 0.469          |
|                                      | 53       | Auto-SCT     | 0.668              | 0.404     | 0.303-1.472   | 0.317          |
|                                      | 114      | Allo-SCT     | 0.935              | 0.349     | 0.472-1.852   | 0.846          |
| <b>Flow MRD status after cycle 1</b> | 196      | Neg          |                    |           |               |                |
|                                      | 77       | Pos          | 2.124              | 0.202     | 1.430-3.153   | 0.000          |
| <b>Flow MRD status after cycle 2</b> | 216      | Neg          |                    |           |               |                |
|                                      | 57       | Pos          | 2.023              | 0.216     | 1.326-3.086   | 0.001          |

Auto-SCT, Autologous stem cell transplantation; Allo-SCT, Allogeneic stem cell transplant; ELN, European Leukemia-NET; Neg, negative; Pos, positive; SE, standard error; CI, confidence interval; WBC, white blood cell count; WHO, world health organization.

**Table S5A: Multivariate model event free survival / MRD after cycle 1**

| <b>EFS - MRD 0.1% cut-off after cycle 1</b> |     |              |             |       |             |         |
|---------------------------------------------|-----|--------------|-------------|-------|-------------|---------|
| Variables                                   | N   |              | Coefficient | SE    | 95% CI      | P Value |
| <b>MRD status after cycle 1</b>             | 77  | Pos          | 2.051       | 0.189 | 1.417-2.968 | 0.000   |
| <b>Age in 3 categories</b>                  | 72  | <=45         |             |       |             |         |
|                                             | 123 | 46-60        | 1.536       | 0.243 | 0.950-2.462 | 0.081   |
|                                             | 78  | >60          | 1.723       | 0.250 | 1.055-2.815 | 0.030   |
| <b>ELN-2017 risk score</b>                  | 112 | Favorable    |             |       |             |         |
|                                             | 82  | Intermediate | 1.110       | 0.232 | 0.705-1.749 | 0.651   |
|                                             | 78  | Adverse      | 1.901       | 0.216 | 1.246-2.901 | 0.003   |

**Table S5B: Multivariate model overall survival / MRD after cycle 1**

| <b>OS - MRD 0.1% cut-off after cycle 1</b> |     |              |             |       |             |         |
|--------------------------------------------|-----|--------------|-------------|-------|-------------|---------|
| Variables                                  | N   |              | Coefficient | SE    | 95% CI      | P Value |
| <b>MRD status after cycle 1</b>            | 77  | Pos          | 2.109       | 0.204 | 1.413-3.148 | 0.000   |
| <b>Age in 3 categories</b>                 | 72  | <=45         |             |       |             |         |
|                                            | 123 | 46-60        | 1.800       | 0.279 | 1.041-3.111 | 0.035   |
|                                            | 78  | >60          | 2.389       | 0.281 | 1.377-4.148 | 0.002   |
| <b>ELN-2017 risk score</b>                 | 112 | Favorable    |             |       |             |         |
|                                            | 82  | Intermediate | 1.234       | 0.268 | 0.730-2.087 | 0.432   |
|                                            | 78  | Adverse      | 2.772       | 0.236 | 1.745-4.405 | 0.003   |

**Table S6A: Multivariate model event free survival / MRD after cycle 2**

| <b>EFS - MRD 0.1% cut-off after cycle 2</b> |     |              |             |       |             |         |
|---------------------------------------------|-----|--------------|-------------|-------|-------------|---------|
| Variables                                   | N   |              | Coefficient | SE    | 95% CI      | P Value |
| <b>MRD status after cycle 2</b>             | 57  |              | 2.068       | 0.202 | 1.391-3.073 | 0.000   |
| <b>Age in 3 categories</b>                  | 72  | <=45         |             |       |             |         |
|                                             | 123 | 46-60        | 1.453       | 0.241 | 0.905-2.332 | 0.122   |
|                                             | 78  | >60          | 1.790       | 0.251 | 1.094-2.929 | 0.020   |
| <b>ELN-2017 risk score</b>                  | 112 | Favorable    |             |       |             |         |
|                                             | 82  | Intermediate | 1.111       | 0.232 | 0.705-1.750 | 0.650   |
|                                             | 78  | Adverse      | 1.924       | 0.216 | 1.260-2.937 | 0.002   |

**Table S6B: Multivariate model overall survival / MRD after cycle 2**

| <b>OS - MRD 0.1% cut-off after cycle 2</b> |          |              |                    |           |               |                |
|--------------------------------------------|----------|--------------|--------------------|-----------|---------------|----------------|
| <b>Variables</b>                           | <b>N</b> |              | <b>Coefficient</b> | <b>SE</b> | <b>95% CI</b> | <b>P Value</b> |
| <b>MRD status after cycle 1</b>            | 77       | Pos          | 2.171              | 0.218     | 1.416-3.329   | 0.000          |
| <b>Age in 3 categories</b>                 | 72       | <=45         |                    |           |               |                |
|                                            | 123      | 46-60        | 1.709              | 0.278     | 0.992-2.945   | 0.053          |
|                                            | 78       | >60          | 2.469              | 0.283     | 1.419-4.297   | 0.001          |
| <b>ELN-2017 risk score</b>                 | 112      | Favorable    |                    |           |               |                |
|                                            | 82       | Intermediate | 1.216              | 0.268     | 0.719-2.057   | 0.465          |
|                                            | 78       | Adverse      | 2.785              | 0.237     | 1.751-4.430   | 0.000          |

**Table S7: Baseline characteristics of four groups categorized by the combined MRD results from after cycle 1 and after cycle 2**

| Variables                     | I (MRD1-MRD2-) |            | II (MRD1+MRD2-) |            | III (MRD1-MRD2+) |            | IV (MRD1+MRD2+) |            | Total |            |       |
|-------------------------------|----------------|------------|-----------------|------------|------------------|------------|-----------------|------------|-------|------------|-------|
|                               | Count          | Column N % | Count           | Column N % | Count            | Column N % | Count           | Column N % | Count | Column N % |       |
| Age                           | <= 45          | 44         | 24.4%           | 10         | 27.8%            | 3          | 18.8%           | 15         | 36.6% | 72         | 26.4% |
|                               | 46-60          | 88         | 48.9%           | 10         | 27.8%            | 8          | 50.0%           | 17         | 41.5% | 123        | 45.1% |
|                               | >60            | 48         | 26.7%           | 16         | 44.4%            | 5          | 31.3%           | 9          | 22.0% | 78         | 28.6% |
| Sex                           | Male           | 90         | 50.0%           | 20         | 55.6%            | 7          | 43.8%           | 18         | 43.9% | 135        | 49.5% |
|                               | Female         | 90         | 50.0%           | 16         | 44.4%            | 9          | 56.3%           | 23         | 56.1% | 138        | 50.5% |
| WHO performance status        | WHO 0          | 89         | 49.4%           | 18         | 50.0%            | 12         | 75.0%           | 17         | 41.5% | 136        | 49.8% |
|                               | WHO 1          | 62         | 34.4%           | 9          | 25.0%            | 3          | 18.8%           | 15         | 36.6% | 89         | 32.6% |
|                               | WHO 2          | 3          | 1.7%            | 1          | 2.8%             | 0          | 0%              | 5          | 12.2% | 9          | 3.3%  |
|                               | Unknown        | 26         | 14.4%           | 8          | 22.2%            | 1          | 6.3%            | 4          | 9.8%  | 39         | 14.3% |
| WBC-count x 10 <sup>9</sup> L | <=20           | 95         | 66.4%           | 21         | 75.0%            | 9          | 69.2%           | 25         | 67.6% | 150        | 54.9% |
|                               | 20-100         | 37         | 25.9%           | 5          | 17.9%            | 4          | 30.8%           | 8          | 21.6% | 54         | 19.8% |
|                               | >100           | 11         | 7.7%            | 2          | 7.1%             | 0          | 0.0%            | 4          | 10.8% | 17         | 6.2%  |
| ELN-2017 risk score           | Favorable      | 82         | 45.6%           | 10         | 27.8%            | 5          | 31.3%           | 15         | 36.6% | 112        | 41.0% |
|                               | Intermediate   | 54         | 30.0%           | 14         | 38.9%            | 6          | 37.5%           | 8          | 19.5% | 82         | 30.0% |
|                               | Adverse        | 43         | 23.9%           | 12         | 33.3%            | 5          | 31.3%           | 18         | 43.9% | 78         | 28.6% |
| FLT3-ITD x NPM1               | neg x neg      | 75         | 41.7%           | 21         | 58.3%            | 6          | 37.5%           | 24         | 58.5% | 126        | 46.2% |
|                               | pos x neg      | 14         | 7.8%            | 6          | 16.7%            | 3          | 18.8%           | 2          | 4.9%  | 25         | 9.2%  |
|                               | neg x pos      | 48         | 26.7%           | 5          | 13.9%            | 2          | 12.5%           | 5          | 12.2% | 60         | 22.0% |
|                               | pos x pos      | 29         | 16.1%           | 3          | 8.3%             | 4          | 25.0%           | 4          | 9.8%  | 40         | 14.7% |
|                               | n.a.           | 14         | 7.8%            | 1          | 2.8%             | 1          | 6.3%            | 6          | 14.6% | 22         | 8.1%  |
| Consolidation treatment       | None           | 19         | 10.6%           | 4          | 11.1%            | 1          | 6.3%            | 2          | 4.9%  | 26         | 9.5%  |
|                               | Cycle 3        | 59         | 32.8%           | 6          | 16.7%            | 4          | 25.0%           | 11         | 26.8% | 80         | 29.3% |
|                               | Auto-SCT       | 37         | 20.6%           | 9          | 25.0%            | 2          | 12.5%           | 5          | 12.2% | 53         | 19.4% |
|                               | Allo-SCT       | 65         | 36.1%           | 17         | 47.2%            | 9          | 56.3%           | 23         | 56.1% | 114        | 41.8% |

Auto-SCT, Autologous stem cell transplantation; Allo-SCT, Allogeneic stem cell transplant; ELN, European Leukemia-NET; Neg, negative; Pos, positive; WBC, white blood cell count; WHO, world health organization.



## Supplementary Figures

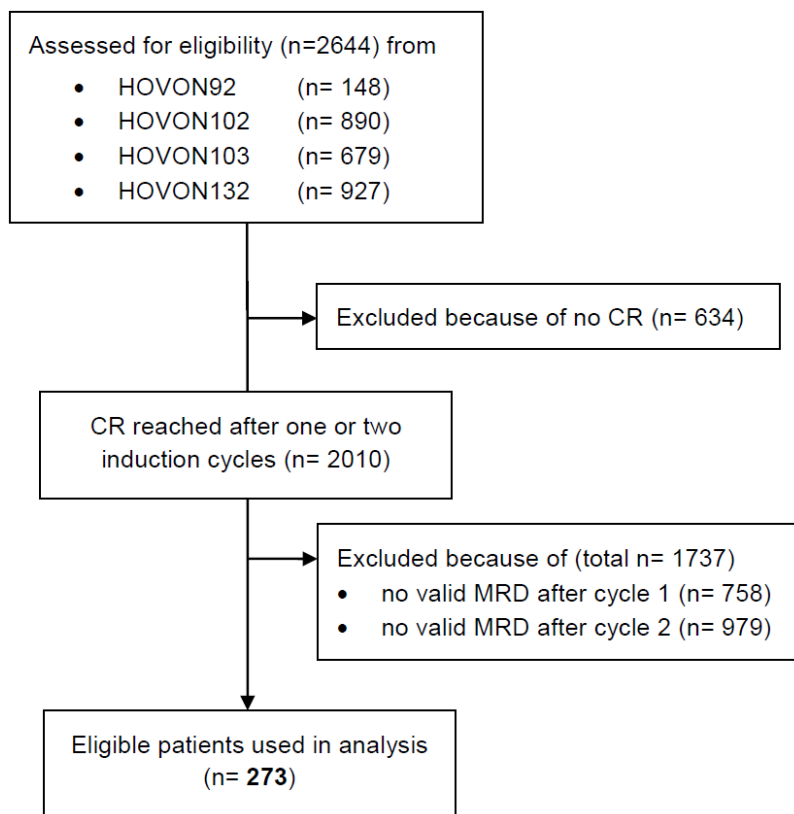

**Figure S1: Patient flow chart.** Patients with AML, included in four consecutive HOVON-SAKK trials, who were eligible for the present analysis with a valid MRD result after first- and second induction chemotherapy.

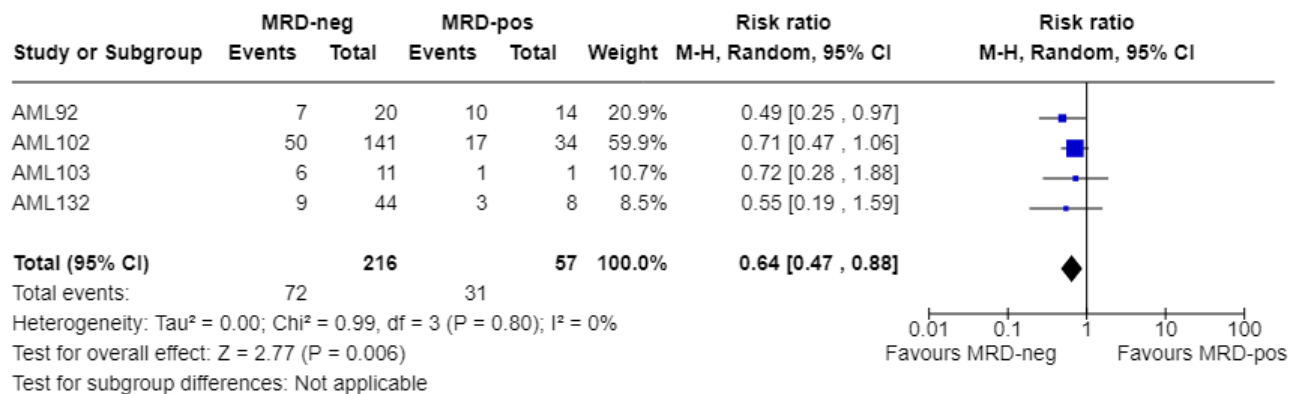

**Figure S2: Heterogeneity between studies for 5-year mortality based on MRD status after cycle 2.**
